# Supplementary material for: Side-chain substitution of poly(3-hexylthiophene) (P3HT) by PCBM via postpolymerization: an intramolecular hybrid of donor and acceptor
Source: Royal Society of Chemistry journal article supplement (doi:10.1039/c2py20651j), 2012-09-15
Supplement: c2py20651j.pdf [file c2py20651j.pdf]

Electronic Supplemental Information for:

## Side-chain Substitution of Poly(3-hexylthiophene) (P3HT) by PCBM via Postpolymerization: An Intramolecular Hybrid of Donor and Acceptor

Muqing Chen,<sup>†a</sup> Minghua Li,<sup>†a,b</sup> Haitao Wang,<sup>a</sup> Shuxuan Qu,<sup>a</sup> Xuemei Zhao,<sup>a</sup> Lixin Xie,<sup>a</sup> and Shangfeng Yang<sup>\*a</sup>

<sup>a</sup> Hefei National Laboratory for Physical Sciences at Microscale, CAS Key Laboratory of Materials for Energy Conversion & Department of Materials Science and Engineering, University of Science and Technology of China (USTC), Hefei 230026, China

<sup>b</sup> Department of Chemistry and Materials Engineering, Hefei University, Hefei 230601, China

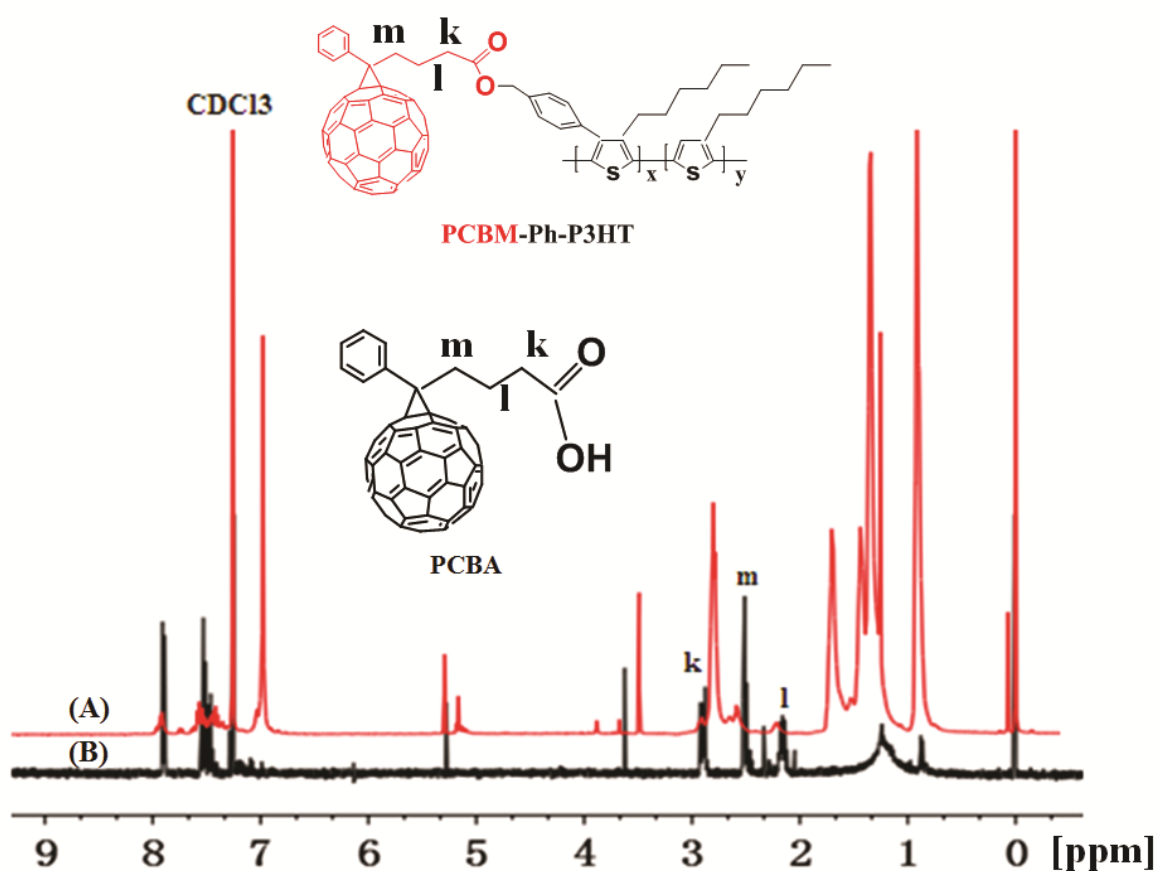

**Figure S1.** <sup>1</sup>H NMR spectra of PCBM-Ph-P3HT (A, copied from Fig. 1D) and PCBA (B). Samples were dissolved in deuterated chloroform, and spectra were recorded at room temperature. The letters k-m label the proton signals from several methylene (-CH<sub>2</sub>-) groups between the carbonyl group and three-membered ring of both PCBM-Ph-P3HT and PCBA.
